# Supplementary material for: A quantum-mechanical investigation of oxygen vacancies and copper doping in the orthorhombic CaSnO3perovskite
Source: Royal Society of Chemistry journal article supplement (doi:10.1039/c8cp03481h), 2018-01-01
Supplement: c8cp03481h1.pdf [file c8cp03481h1.pdf]

## A Quantum-Mechanical investigation of Oxygen Vacancy and Copper Doping in the Orthorhombic $\text{CaSnO}_3$ Perovskite

Jefferson Maul, S. Casassa, and Alessandro Erba  
*Dipartimento di Chimica, Università di Torino, via Giuria 5, 10125, Torino, Italy\**

I. M. G. Santos  
*Núcleo de Pesquisa e Extensão: Laboratório de Combustíveis e Materiais,  
Universidade Federal da Paraíba, CEP 58051-900, João Pessoa, PB, Brazil*

J. R. Sambrano  
*Computational Simulation Group, CDMF-UNESP, São Paulo State University, CEP 17033-360, Bauru, SP, Brazil*

Animation of the vibrational modes of  $\text{CaSnO}_3$  for the pristine and oxygen vacancy cases, as calculated at PBE level, can be found in the following links respectively:

[http://www.crystal.unito.it/vibs/CaSnO3/index.html?name=CaSnO3\\_Pristine\\_PBE.xyz](http://www.crystal.unito.it/vibs/CaSnO3/index.html?name=CaSnO3_Pristine_PBE.xyz)

[http://www.crystal.unito.it/vibs/CaSnO3/index.html?name=CaSnO3\\_Oxygen\\_Vacancy\\_PBE.xyz](http://www.crystal.unito.it/vibs/CaSnO3/index.html?name=CaSnO3_Oxygen_Vacancy_PBE.xyz)

TABLE I: Bond lengths of oxygen atoms toward Sn in octahedral site and its defective counterpart (XX represent vacant atom), in both position  $O_{ap}$  and  $O_{eq}$  and calculation level (PBE and PBE0). The bond lengths are given in Å and the volume ( $D_{VOL}$ ) is given in % tanking as reference the bulk volume.

| Level | Position    | Method       | Config. | $D_{VOL}$ | $O_{ap}1/XX$ | $O_{ap}2$ | $O_{eq}1$ | $O_{eq}2$ | $O_{eq}3/XX$ | $O_{eq}4$ |
|-------|-------------|--------------|---------|-----------|--------------|-----------|-----------|-----------|--------------|-----------|
| PBE   | <i>Bulk</i> | closed-shell | ref     |           | 2.102        | 2.102     | 2.095     | 2.095     | 2.098        | 2.098     |
| PBE0  | <i>Bulk</i> | closed-shell | ref     |           | 2.070        | 2.070     | 2.066     | 2.066     | 2.069        | 2.069     |
|       |             | closed-shell | -0.04   | -         | 2.155        | 2.121     | 2.112     | 2.112     | 2.127        | 2.124     |
|       |             | AR           | singlet | -0.04     | -            | 2.155     | 2.121     | 2.112     | 2.127        | 2.124     |
|       | $O_{ap}$    | triplet      | 0.35    | -         | 2.079        | 2.123     | 2.126     | 2.134     | 2.133        | 2.133     |
|       |             | closed-shell | -0.03   | 2.145     | 2.150        | 2.122     | 2.111     | 2.126     | 2.123        | 2.123     |
|       |             | GH           | singlet | -0.03     | 2.134        | 2.150     | 2.122     | 2.111     | 2.126        | 2.123     |
| PBE   |             | triplet      | 0.36    | 2.029     | 2.076        | 2.122     | 2.125     | 2.132     | 2.131        | 2.131     |
|       |             | closed-shell | -0.02   | 2.129     | 2.128        | 2.122     | 2.130     | -         | 2.168        | 2.168     |
|       |             | AR           | singlet | -0.02     | 2.129        | 2.128     | 2.122     | 2.130     | -            | 2.168     |
|       | $O_{eq}$    | triplet      | 0.37    | 2.123     | 2.140        | 2.124     | 2.122     | -         | 2.079        | 2.079     |
|       |             | closed-shell | 0.00    | 2.127     | 2.127        | 2.120     | 2.127     | 1.744     | 2.154        | 2.154     |
|       |             | GH           | singlet | 0.00      | 2.128        | 2.127     | 2.121     | 2.128     | 1.898        | 2.155     |
|       |             | triplet      | 0.38    | 2.121     | 2.136        | 2.121     | 2.120     | 2.159     | 2.075        | 2.075     |
|       |             | closed-shell | -0.10   | -         | 2.137        | 2.090     | 2.079     | 2.093     | 2.091        | 2.091     |
|       |             | AR           | singlet | -0.10     | -            | 2.137     | 2.090     | 2.079     | 2.093        | 2.091     |
|       | $O_{ap}$    | triplet      | 0.28    | -         | 2.053        | 2.102     | 2.111     | 2.121     | 2.112        | 2.112     |
|       |             | closed-shell | -0.09   | 2.201     | 2.134        | 2.091     | 2.080     | 2.093     | 2.092        | 2.092     |
|       |             | GH           | singlet | -0.12     | 2.665        | 2.136     | 2.088     | 2.078     | 2.092        | 2.090     |
|       |             | triplet      | 0.28    | 2.181     | 2.050        | 2.102     | 2.111     | 2.119     | 2.111        | 2.111     |

\*Electronic address: [jmauldea@unito.it](mailto:jmauldea@unito.it)

TABLE II: Atomic net charge ( $q$ ) and spin density ( $\mu$ ) as calculated by both Mulliken ( $q_M$  and  $\mu_M$ ) and Hirshfeld-I ( $q_H$  and  $\mu_H$ ) of SnO<sub>6</sub> octahedral site and vacancy alike at PBE and PBE0 level. Two oxygen position ( $O_{ap}$  and  $O_{eq}$ ) taking as reference the central Sn are displayed, with quantities given in  $|e|$ .

| Level       | Position    | Method       | Config.      | $q/\mu$ | Sn     | $O_{ap1}/XX$ | $O_{ap2}$ | $O_{eq1}$ | $O_{eq2}$ | $O_{eq3}$ | $O_{eq4}$ |        |        |
|-------------|-------------|--------------|--------------|---------|--------|--------------|-----------|-----------|-----------|-----------|-----------|--------|--------|
| PBE         | <i>Bulk</i> | PBE          | closed-shell | $q_M$   | 1.516  | -1.010       | -1.010    | -1.014    | -1.014    | -1.014    | -1.014    | -1.014 |        |
|             |             |              |              | $q_H$   | 2.258  | -1.274       | -1.274    | -1.272    | -1.272    | -1.272    | -1.272    | -1.272 | -1.272 |
|             |             |              |              | $q_M$   | 0.979  | -            | -1.015    | -0.990    | -1.002    | -0.995    | -0.995    | -0.995 | -0.995 |
|             |             |              |              | $q_H$   | 1.246  | -            | -1.173    | -1.172    | -1.177    | -1.176    | -1.168    | -1.168 | -1.168 |
|             |             |              |              | $q_M$   | 0.979  | -            | -1.015    | -0.990    | -1.002    | -0.995    | -0.995    | -0.995 | -0.995 |
|             |             |              |              | $q_H$   | 1.246  | -            | -1.173    | -1.172    | -1.177    | -1.176    | -1.168    | -1.168 | -1.168 |
|             | $O_{ap}$    | AR           | triplet      | $q_M$   | 0.991  | -            | -1.006    | -0.975    | -0.989    | -0.981    | -0.979    | -0.979 | -0.979 |
|             |             |              |              | $q_H$   | 1.350  | -            | -1.174    | -1.183    | -1.184    | -1.183    | -1.177    | -1.177 | -1.177 |
|             |             |              |              | $\mu_M$ | 0.492  | -            | 0.001     | 0.073     | 0.045     | 0.055     | 0.070     | 0.070  | 0.070  |
|             |             |              |              | $\mu_H$ | 0.367  | -            | 0.005     | 0.095     | 0.072     | 0.082     | 0.091     | 0.091  | 0.091  |
|             |             |              |              | $q_M$   | 1.055  | 0.174        | -1.014    | -1.001    | -0.998    | -0.990    | -0.994    | -0.994 | -0.994 |
|             |             |              |              | $q_H$   | 1.220  | 0.000        | -1.169    | -1.166    | -1.170    | -1.168    | -1.162    | -1.162 | -1.162 |
|             | $O_{eq}$    | GH           | triplet      | $q_M$   | 1.056  | 0.175        | -1.014    | -1.001    | -0.998    | -0.990    | -0.995    | -0.995 | -0.995 |
|             |             |              |              | $q_H$   | 1.227  | 0.000        | -1.170    | -1.167    | -1.171    | -1.169    | -1.163    | -1.163 | -1.163 |
|             |             |              |              | $q_M$   | 1.059  | 0.139        | -1.002    | -0.973    | -0.992    | -0.985    | -0.977    | -0.977 | -0.977 |
|             |             |              |              | $q_H$   | 1.327  | 0.000        | -1.275    | -1.177    | -1.178    | -1.273    | -1.172    | -1.172 | -1.172 |
|             |             |              |              | $\mu_M$ | 0.417  | 0.126        | 0.002     | 0.071     | 0.045     | 0.055     | 0.068     | 0.068  | 0.068  |
|             |             |              |              | $\mu_H$ | 0.378  | 0.000        | 0.005     | 0.091     | 0.067     | 0.077     | 0.087     | 0.087  | 0.087  |
| $O_{eq}$    | AR          | triplet      | $q_M$        | 0.987   | -0.987 | -0.993       | -1.001    | -0.991    | -         | -1.018    | -1.018    | -1.018 |        |
|             |             |              | $q_H$        | 1.250   | -1.170 | -1.174       | -1.177    | -1.168    | -         | -1.174    | -1.174    | -1.174 |        |
|             |             |              | $q_M$        | 0.987   | -0.987 | -0.993       | -1.001    | -0.991    | -         | -1.018    | -1.018    | -1.018 |        |
|             |             |              | $q_H$        | 1.250   | -1.170 | -1.174       | -1.177    | -1.168    | -         | -1.174    | -1.174    | -1.174 |        |
|             |             |              | $q_M$        | 1.025   | -0.970 | -0.977       | -0.985    | -0.978    | -         | -1.010    | -1.010    | -1.010 |        |
|             |             |              | $q_H$        | 1.413   | -1.180 | -1.186       | -1.187    | -1.181    | -         | -1.180    | -1.180    | -1.180 |        |
| $O_{eq}$    | GH          | triplet      | $\mu_M$      | 0.454   | 0.067  | 0.053        | 0.048     | 0.061     | -         | 0.000     | 0.000     | 0.000  |        |
|             |             |              | $\mu_H$      | 0.338   | 0.087  | 0.075        | 0.072     | 0.084     | -         | 0.004     | 0.004     | 0.004  |        |
|             |             |              | $q_M$        | 1.093   | -0.990 | -0.992       | -0.994    | -0.996    | 0.176     | -1.016    | -1.016    | -1.016 |        |
|             |             |              | $q_H$        | 1.242   | -1.166 | -1.170       | -1.171    | -1.163    | 0.000     | -1.171    | -1.171    | -1.171 |        |
|             |             |              | $q_M$        | 1.088   | -0.990 | -0.993       | -0.995    | -0.997    | 0.180     | -1.017    | -1.017    | -1.017 |        |
|             |             |              | $q_H$        | 1.237   | -1.166 | -1.170       | -1.171    | -1.163    | 0.000     | -1.170    | -1.170    | -1.170 |        |
| <i>Bulk</i> | PBE0        | closed-shell | $q_M$        | 1.123   | -0.975 | -0.980       | -0.983    | -0.986    | 0.167     | -1.008    | -1.008    | -1.008 |        |
|             |             |              | $q_H$        | 1.400   | -1.176 | -1.181       | -1.272    | -1.176    | 0.000     | -1.178    | -1.178    | -1.178 |        |
|             |             |              | $\mu_M$      | 0.370   | 0.065  | 0.052        | 0.046     | 0.061     | 0.138     | 0.001     | 0.001     | 0.001  |        |
|             |             |              | $\mu_H$      | 0.345   | 0.081  | 0.069        | 0.066     | 0.079     | 0.000     | 0.004     | 0.004     | 0.004  |        |
|             |             |              | $q_M$        | 1.762   | -1.115 | -1.115       | -1.115    | -1.115    | -1.115    | -1.115    | -1.115    | -1.115 |        |
|             |             |              | $q_H$        | 2.409   | -1.355 | -1.355       | -1.351    | -1.351    | -1.351    | -1.351    | -1.351    | -1.351 |        |
| $O_{eq}$    | AR          | triplet      | $q_M$        | 1.163   | -      | -1.120       | -1.090    | -1.103    | -1.097    | -1.097    | -1.097    |        |        |
|             |             |              | $q_H$        | 1.479   | -      | -1.276       | -1.276    | -1.277    | -1.281    | -1.273    | -1.273    |        |        |
|             |             |              | $q_M$        | 1.162   | -      | -1.120       | -1.090    | -1.104    | -1.097    | -1.097    | -1.097    |        |        |
|             |             |              | $q_H$        | 1.477   | -      | -1.276       | -1.277    | -1.283    | -1.280    | -1.273    | -1.273    |        |        |
|             |             |              | $q_M$        | 1.128   | -      | -1.112       | -1.075    | -1.092    | -1.087    | -1.082    | -1.082    |        |        |
|             |             |              | $q_H$        | 1.489   | -      | -1.262       | -1.285    | -1.284    | -1.284    | -1.281    | -1.281    |        |        |
| $O_{eq}$    | GH          | triplet      | $\mu_M$      | 0.653   | 0.000  | -0.001       | 0.077     | 0.043     | 0.054     | 0.073     | 0.073     |        |        |
|             |             |              | $\mu_H$      | 0.482   | -      | 0.001        | 0.110     | 0.077     | 0.087     | 0.103     | 0.103     |        |        |
|             |             |              | $q_M$        | 1.244   | 0.184  | -1.120       | -1.099    | -1.101    | -1.101    | -1.096    | -1.096    |        |        |
|             |             |              | $q_H$        | 1.452   | 0.000  | -1.273       | -1.272    | -1.276    | -1.273    | -1.267    | -1.267    |        |        |
|             |             |              | $q_M$        | 1.226   | 0.118  | -1.120       | -1.101    | -1.103    | -1.100    | -1.098    | -1.098    |        |        |
|             |             |              | $q_H$        | 1.501   | 0.000  | -1.279       | -1.278    | -1.283    | -1.280    | -1.274    | -1.274    |        |        |
| $O_{eq}$    | GH          | triplet      | $q_M$        | 1.218   | 0.184  | -1.111       | -1.084    | -1.089    | -1.091    | -1.081    | -1.081    |        |        |
|             |             |              | $q_H$        | 1.462   | 0.000  | -1.258       | -1.279    | -1.276    | -1.276    | -1.275    | -1.275    |        |        |
|             |             |              | $\mu_M$      | 0.562   | 0.167  | -0.001       | 0.079     | 0.043     | 0.054     | 0.072     | 0.072     |        |        |
|             |             |              | $\mu_H$      | 0.495   | 0.000  | 0.001        | 0.108     | 0.071     | 0.082     | 0.098     | 0.098     |        |        |

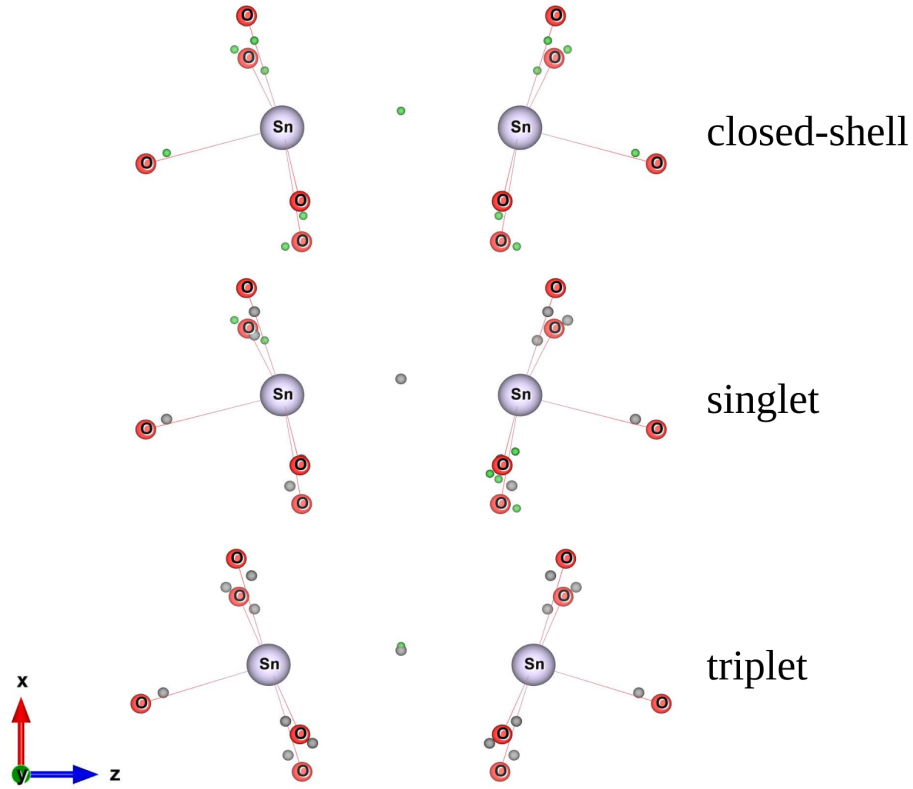

FIG. 1: Wannier centroid's representation of vacancy containing site. Oxygen and Tin atoms are labeled , and the spheres between them represents the centroid of the Wannier localization. The smaller one are characterized as alpha electrons and the other the beta ones.

TABLE IV: Bond lengths of oxygen atoms toward Sn and Cu in octahedral site and its defective counterpart (XX represent vacant atom), at  $O_{ap}$  as calculated at PBE0 level and GH method. The bond lengths are given in Å and the volume ( $D_{VOL}$ ) is given in % tanking as reference the bulk volume.

| Atom | Neighbor        | $D_{VOL}$ | $O_{ap}1/XX$ | $O_{ap}2$ | $O_{eq}1$ | $O_{eq}2$ | $O_{eq}3$ | $O_{eq}4$ |
|------|-----------------|-----------|--------------|-----------|-----------|-----------|-----------|-----------|
|      | bulk            | ref       | 2.070        | 2.070     | 2.066     | 2.066     | 2.069     | 2.069     |
|      | no vacancy      | -0.37     | 2.137        | 2.066     | 2.052     | 2.058     | 2.061     | 2.051     |
| Sn   | first neighbor  | -0.15     | 1.778        | 1.969     | 2.033     | 2.026     | 2.038     | 2.026     |
|      | second neighbor | 0.04      | 1.838        | 1.976     | 1.961     | 2.018     | 2.040     | 2.066     |
|      | third neighbor  | 0.09      | 2.153        | 1.978     | 2.052     | 2.065     | 2.009     | 1.968     |
|      | no vacancy      | -0.37     | 1.945        | 1.945     | 2.071     | 2.072     | 1.959     | 1.960     |
| Cu   | first neighbor  | -0.15     | 2.551        | 2.088     | 2.012     | 2.038     | 2.011     | 2.040     |
|      | second neighbor | 0.04      | 2.034        | 2.043     | 2.048     | 2.069     | 2.253     | 2.170     |
|      | third neighbor  | 0.09      | 2.037        | 2.047     | 2.165     | 2.296     | 2.048     | 2.092     |
|      | no vacancy      | -0.37     | 1.945        | 1.945     | 2.071     | 2.072     | 1.959     | 1.960     |

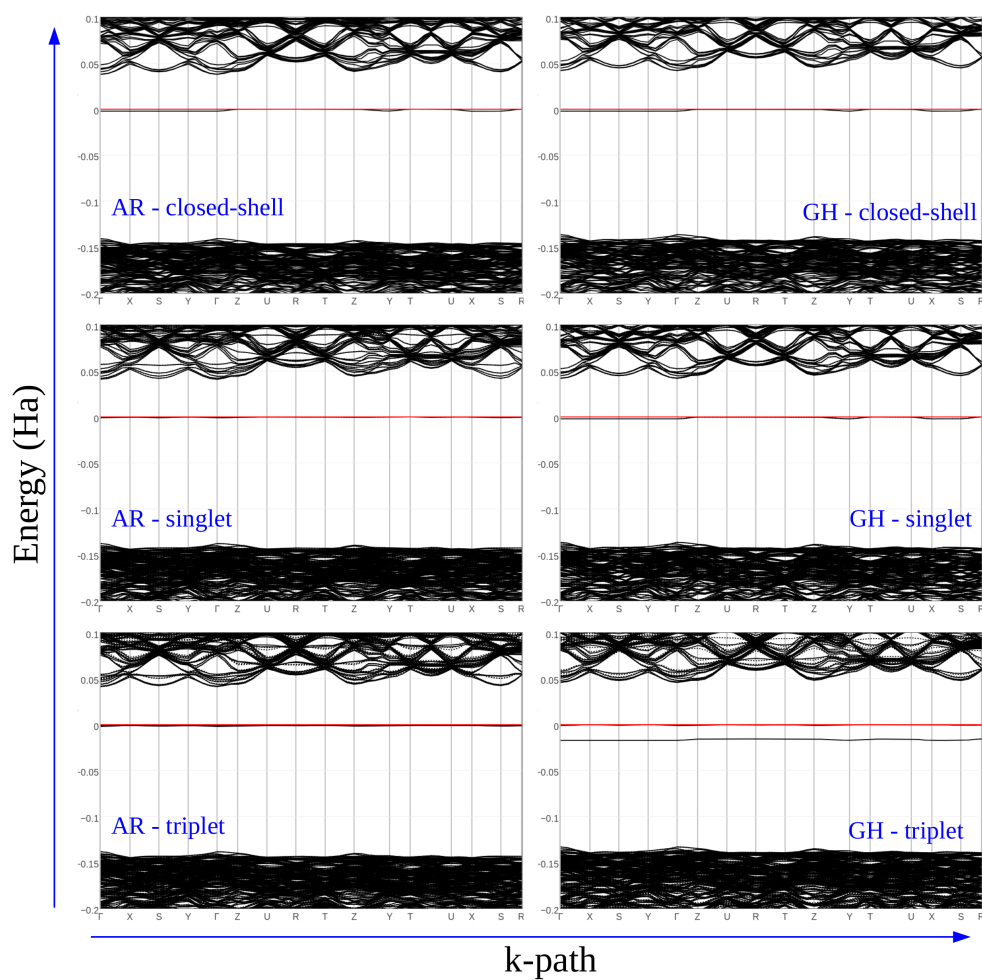

FIG. 2: Band structure of  $\text{CaTiO}_3$  at PBE0 level for the three electronic configuration closed-shell, singlet and triplet. The methods **AR** and **GH** are placed into the left and right columns, respectively. Fermi energy are placed as a straight red line.

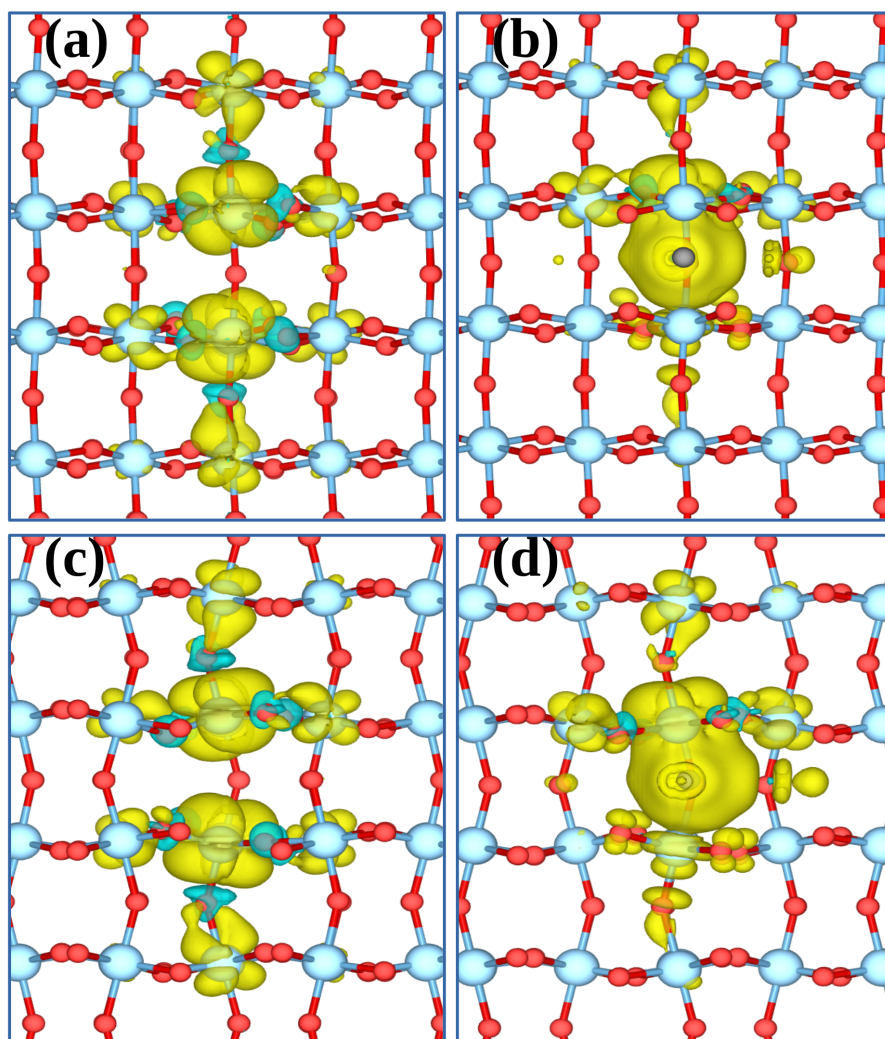

FIG. 3: Spin density 3D maps (cutoff  $0.001 e/a_0^3$ ) for the  $\text{CaTiO}_3$  (a) and (c) are two views of the **AR** model and (b) and (d) are two views of the **GH** model. All calcium atoms have been removed for clarity.

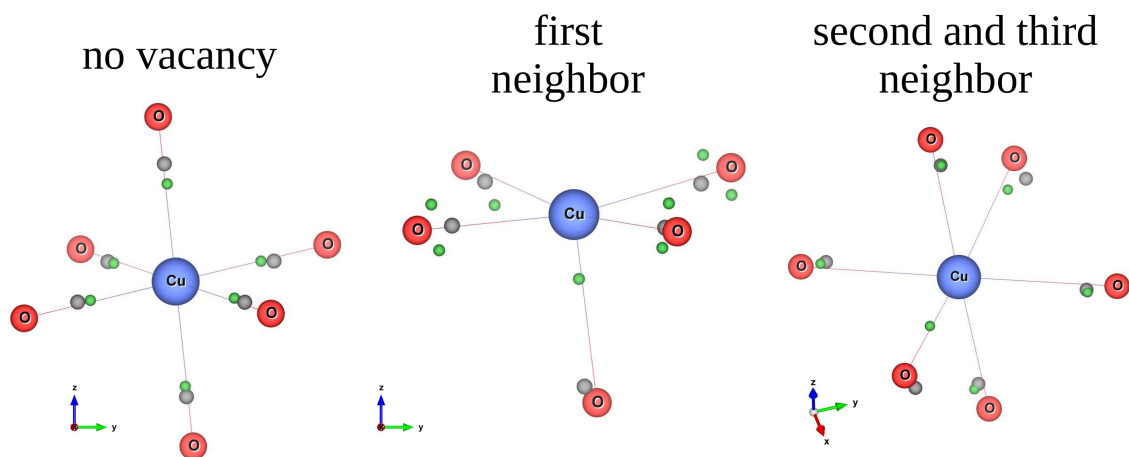

FIG. 4: Wannier centroid's representation of the doping site. Oxygen and Copper atoms are labeled, and the spheres between them represents the centroid of the Wannier localization. The smaller one are characterized as alpha electrons and the other the beta ones.

TABLE V: Atomic net charge ( $q$ ) and spin density ( $\mu$ ) as calculated by both Mulliken ( $q_M$  and  $\mu_M$ ) and Hirshfeld ( $q_H$  and  $\mu_H$ ) of  $\text{SnO}_6$  and  $\text{CuO}_6$  “octahedral” sites and its defective sites or surrounds. Both quantities are given in  $|e|$ . The Sn atom is always a first neighbor of the vacancy, apart from the NV case in which it is neighbor of the doped site.

| Atom        | Cu Neighbor     | Method    | $q/\mu$ | Sn    | $O_{ap1}/XX$ | $O_{ap2}$ | $O_{eq1}$ | $O_{eq2}$ | $O_{eq3}$ | $O_{eq4}$ |
|-------------|-----------------|-----------|---------|-------|--------------|-----------|-----------|-----------|-----------|-----------|
| <i>Bulk</i> | -               | -         | $q_M$   | 1.762 | -1.115       | -1.115    | -1.115    | -1.115    | -1.115    | -1.115    |
|             |                 |           | $q_H$   | 2.409 | -1.355       | -1.355    | -1.351    | -1.351    | -1.351    | -1.351    |
|             | no vacancy      | -         | $q_M$   | 1.737 | -0.945       | -1.113    | -1.116    | -1.104    | -1.110    | -1.110    |
|             |                 |           | $q_H$   | 2.376 | -1.054       | -1.353    | -1.351    | -1.338    | -1.344    | -1.345    |
|             | first neighbor  | <b>AR</b> | $q_M$   | 1.546 | -            | -1.087    | -1.078    | -1.073    | -1.072    | -1.067    |
|             |                 |           | $q_H$   | 2.275 | -            | -1.334    | -1.325    | -1.328    | -1.322    | -1.318    |
|             | first neighbor  | <b>GH</b> | $q_M$   | 1.565 | 0.080        | -1.081    | -1.072    | -1.071    | -1.071    | -1.069    |
|             |                 |           | $q_H$   | 2.265 | 0.000        | -1.334    | -1.324    | -1.325    | -1.319    | -1.316    |
| Sn          | second neighbor | <b>AR</b> | $q_M$   | 1.495 | -            | -1.086    | -1.039    | -1.082    | -1.078    | -1.086    |
|             |                 |           | $q_H$   | 2.230 | -            | -1.337    | -1.246    | -1.323    | -1.333    | -1.338    |
|             | second neighbor | <b>GH</b> | $q_M$   | 1.522 | 0.072        | -1.083    | -1.042    | -1.078    | -1.081    | -1.086    |
|             |                 |           | $q_H$   | 2.221 | 0.000        | -1.337    | -1.242    | -1.322    | -1.331    | -1.335    |
|             | third neighbor  | <b>AR</b> | $q_M$   | 1.489 | -            | -1.080    | -1.080    | -1.094    | -1.067    | -1.042    |
|             |                 |           | $q_H$   | 2.230 | -            | -1.334    | -1.347    | -1.340    | -1.315    | -1.248    |
|             | third neighbor  | <b>GH</b> | $q_M$   | 1.513 | 0.075        | -1.076    | -1.073    | -1.094    | -1.072    | -1.046    |
|             |                 |           | $q_H$   | 2.223 | 0.000        | -1.334    | -1.344    | -1.341    | -1.312    | -1.245    |
|             | no vacancy      | -         | $q_M$   | 0.889 | -0.945       | -0.949    | -1.007    | -1.007    | -0.954    | -0.953    |
|             |                 |           | $q_H$   | 0.926 | -1.054       | -1.061    | -1.150    | -1.151    | -1.066    | -1.064    |
|             |                 |           | $\mu_M$ | 0.469 | -0.026       | 0.012     | 0.231     | 0.228     | 0.034     | 0.003     |
|             |                 |           | $\mu_H$ | 0.519 | -0.038       | 0.019     | 0.207     | 0.205     | 0.031     | -0.004    |
|             | first neighbor  | <b>AR</b> | $q_M$   | 0.689 | -            | -1.103    | -1.068    | -1.073    | -1.064    | -1.068    |
|             |                 |           | $q_H$   | 0.668 | -            | -1.275    | -1.220    | -1.215    | -1.211    | -1.220    |
|             |                 |           | $\mu_M$ | 0.712 | -            | 0.000     | 0.058     | 0.064     | 0.068     | 0.059     |
|             |                 |           | $\mu_H$ | 0.728 | -            | -0.002    | 0.055     | 0.059     | 0.062     | 0.056     |
|             | first neighbor  | <b>GH</b> | $q_M$   | 0.720 | 0.080        | -1.099    | -1.069    | -1.078    | -1.068    | -1.073    |
|             |                 |           | $q_H$   | 0.661 | 0.000        | -1.274    | -1.218    | -1.214    | -1.208    | -1.218    |
|             |                 |           | $\mu_M$ | 0.712 | -0.003       | 0.000     | 0.059     | 0.064     | 0.068     | 0.059     |
|             |                 |           | $\mu_H$ | 0.727 | 0.000        | -0.002    | 0.055     | 0.060     | 0.063     | 0.056     |
| Cu          | second neighbor | <b>AR</b> | $q_M$   | 0.798 | -1.092       | -1.091    | -1.093    | -1.093    | -1.039    | -1.106    |
|             |                 |           | $q_H$   | 0.747 | -1.235       | -1.235    | -1.232    | -1.239    | -1.246    | -1.288    |
|             |                 |           | $\mu_M$ | 0.758 | 0.053        | 0.053     | 0.051     | 0.048     | 0.001     | 0.000     |
|             |                 |           | $\mu_H$ | 0.766 | 0.051        | 0.052     | 0.049     | 0.047     | -0.002    | -0.002    |
|             | second neighbor | <b>GH</b> | $q_M$   | 0.798 | -1.092       | -1.091    | -1.093    | -1.094    | -1.042    | -1.106    |
|             |                 |           | $q_H$   | 0.746 | -1.234       | -1.234    | -1.232    | -1.239    | -1.242    | -1.288    |
|             |                 |           | $\mu_M$ | 0.757 | 0.053        | 0.053     | 0.051     | 0.048     | 0.001     | 0.000     |
|             |                 |           | $\mu_H$ | 0.766 | 0.051        | 0.052     | 0.049     | 0.047     | -0.002    | -0.002    |
|             | third neighbor  | <b>AR</b> | $q_M$   | 0.792 | -1.092       | -1.088    | -1.108    | -1.042    | -1.086    | -1.098    |
|             |                 |           | $q_H$   | 0.742 | -1.235       | -1.231    | -1.283    | -1.248    | -1.233    | -1.243    |
|             |                 |           | $\mu_M$ | 0.755 | 0.055        | 0.055     | 0.000     | 0.001     | 0.054     | 0.046     |
|             |                 |           | $\mu_H$ | 0.764 | 0.053        | 0.053     | -0.002    | -0.002    | 0.052     | 0.046     |
|             | third neighbor  | <b>GH</b> | $q_M$   | 0.792 | -1.092       | -1.087    | -1.108    | -1.046    | -1.087    | -1.098    |
|             |                 |           | $q_H$   | 0.741 | -1.234       | -1.228    | -1.283    | -1.245    | -1.233    | -1.243    |
|             |                 |           | $\mu_M$ | 0.755 | 0.055        | 0.055     | 0.000     | 0.001     | 0.054     | 0.046     |
|             |                 |           | $\mu_H$ | 0.763 | 0.053        | 0.053     | -0.002    | -0.002    | 0.052     | 0.046     |

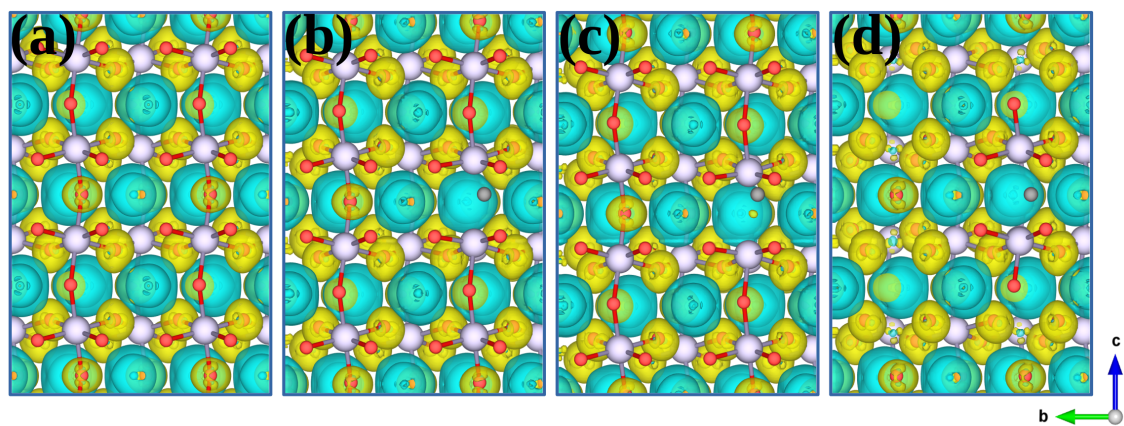

FIG. 5: CaSnO<sub>3</sub> 3D interaction densities (difference between the electron density of the interacting system and the superposition of atomic non-interacting densities) with a cutoff  $0.015 e/a_0^3$  (a) Pristine System (b) Restricted (c) Singlet (d) Triplet. The Calcium atoms are omitted for a better view. The grey small ball presents the "ghost" atom, a.k.a. vacant atom.
